# Supplementary material for: Understanding enormous redshifts in highly concentrated Mn2+ phosphors
Source: Royal Society of Chemistry journal article supplement (doi:10.1039/d3tc00778b), 2023-01-01
Supplement: d3tc00778b1.pdf [file d3tc00778b1.pdf]

## Supporting Information

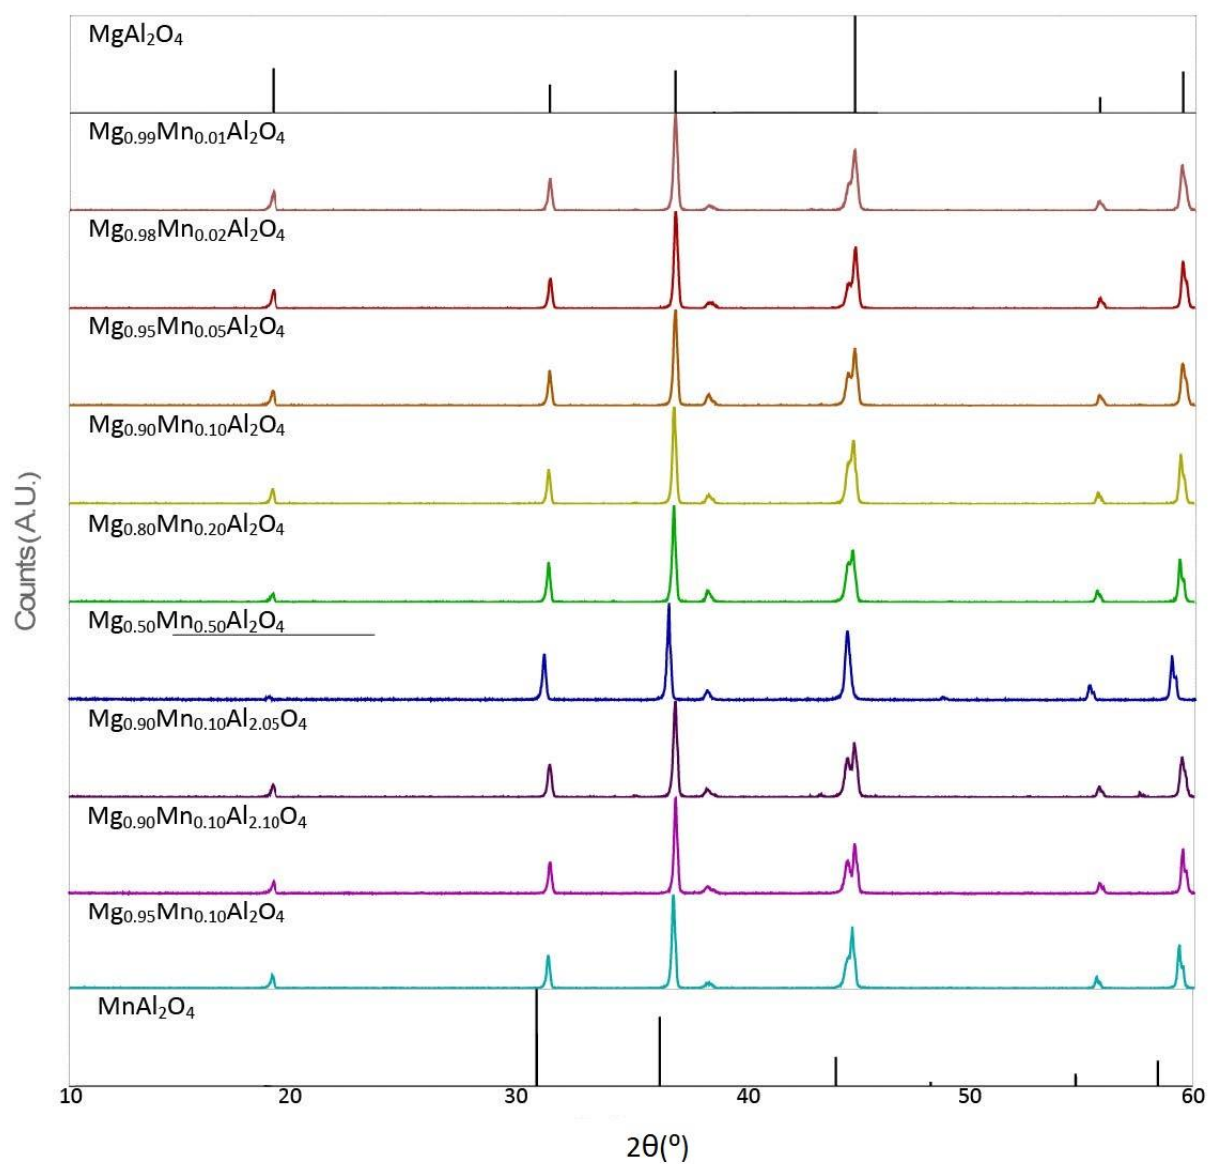

Figure S1 XRD on the top and bottom  $\text{MgAl}_2\text{O}_4$  and  $\text{MnAl}_2\text{O}_4$  reference spectrum are shown
